# Supplementary material
Source: MDPI journal article supplement (https://www.mdpi.com/2227-9717/10/6/1144)
Supplement: s1 [file s1 › processes-1755030-supplementary.pdf]

# Thermochemical Analysis of a Packed-Bed Reactor Using Finite Elements with FlexPDE and COMSOL Multiphysics

Sebastian Taco-Vasquez <sup>1,\*</sup>, César A. Ron <sup>1</sup>, Herman A. Murillo <sup>1</sup>, Andrés Chico <sup>1</sup>, and Paul G. Arauz <sup>2</sup>

<sup>1</sup> Department of Chemical Engineering, Escuela Politécnica Nacional, Quito-Ecuador; sebastian.taco@epn.edu.ec; cesar.ron@epn.edu.ec; herman.murillo@epn.edu.ec; andres.chico@epn.edu.ec

<sup>2</sup> Department of Mechanical Engineering, Universidad San Francisco de Quito, Quito-Ecuador; parauz@usfq.edu.ec

\* Correspondence: sebastian.taco@epn.edu.ec

**Supplementary material**

## SECTION A

### CALCULATION OF THE SPEED OF EACH COMPONENT AND THE REACTION HEAT

Reaction Stoichiometry:

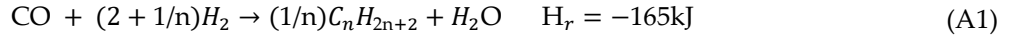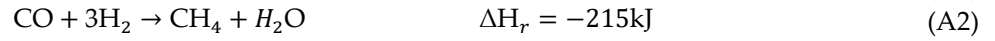

Reaction Rate of Monoxide and Methane

$$-r_{\text{co}} = \frac{(1-\beta_{\text{co}}t)A_{\text{co}}^{\text{'}}e^{E_{\text{co}}/RT_o(\frac{1-\theta}{\theta})}y_{\text{co}}y_{\text{H}_2}}{(1 + K_{\text{co}}y_{\text{co}})^2} \quad (\text{A3})$$

$$r_{\text{CH}_4} = \frac{(1-\beta_{\text{CH}_4}t)A_{\text{CH}_4}^{\text{'}}e^{E_{\text{CH}_4}/RT_o(\frac{1-\theta}{\theta})}y_{\text{CO}}^{1/2}y_{\text{H}_2}}{(1 - K_{\text{co}}y_{\text{co}})^2} \quad (\text{A4})$$

Schulz-Flory-Anderson distribution

$$r_n = r_3\alpha^{n-3}, \quad n \geq 3 \quad ; \quad \text{C}_2/\text{C}_3 = \gamma \quad (\text{A5})$$

According to the stoichiometry of the Reaction:

$$r_{\text{H}_2\text{O}} = -r_{\text{CO}} \quad (\text{A6})$$

Carbon Balance:

$$r_{\text{co}} + r_{\text{CH}_4} + 2r_2 + \sum_{n=3}^1 nr_n = 0 \quad (\text{A7})$$

Hydrogen Balance:

$$r_{H_2} + r_{H_2O} + 2r_{CH_4} + 3r_2 + \sum_{n=3}^1 (n+1)r_n = 0 \quad (A8)$$

Replacing A5 in A7 and A8

$$r_{CO} + r_{CH_4} + 2\gamma r_3 + r_3 \sum_{n=3}^1 n\alpha^{n-3} = 0 \quad (A9)$$

$$r_{H_2} - r_{CO} + 2r_{CH_4} + 3\gamma r_3 - r_3 \sum_{n=3}^1 (n+1)\alpha^{n-3} = 0 \quad (A10)$$

The Summation factor can be replaced by

$$S_1 = \sum_{n=3}^1 n\alpha^{n-3} = \frac{3-2\alpha}{(1-\alpha)^2} \quad (A11)$$

$$S_2 = \sum_{n=3}^1 (n+1)\alpha^{n-3} = \frac{4-3\alpha}{(1-\alpha)^2} \quad (A12)$$

$r_3$  y  $r_{H_2}$  from A9 and A10

$$r_3 = -\frac{r_{CO} + r_{CH_4}}{2\gamma + S_1} \quad (A13)$$

$$r_{H_2} = -[-r_{CO} + 2r_{CH_4} + r_3(3\gamma + S_2)] \quad (A14)$$

$$(-\Delta H)r_v = 215000r_{CH_4} - 165000(r_{CO} + r_{CH}) \quad (A15)$$

$r_n$  can be calculated from de AI 5,  $r_2 = \gamma r_3$  and  $r_{H_2O} = -r_{CO}$

(A16)

## SECTION B

### CALCULATION OF THE TOTAL HEAT TRANSFER COEFFICIENT $U_c$

If the wall thickness is considerable and the heat transfer through the wall decreases, it is advisable to use the through-wall conduction model. However, it is possible to calculate a global heat transfer factor  $U_c$  which considers the heat transfer through the wall and the convention with the cooling fluid and translate it to the homogeneous dynamic model instead of the value of  $\alpha_w$ .

The calculation is as follows:

Heat Balance in Tube Thickness:

$$\lambda_w \frac{1}{r} \frac{\partial}{\partial r} \left( r \frac{\partial T}{\partial r} \right) = 0 \quad (B1)$$

Border Conditions:

$$\lambda_{cr} \frac{\partial T}{\partial r} \Big|_{r=R} = \lambda_w \frac{\partial T}{\partial r} \Big|_{r=R} \quad (B2)$$

$$-\lambda_w \frac{\partial T}{\partial r} \Big|_{r=R_0} = \alpha_w (T_{R_0} - T_c) \quad (B3)$$

From equation A1

$$T = C_1 \ln r + C_2 \quad (B4)$$

$$\frac{\partial T}{\partial r} = \frac{C_1}{r} \quad (B5)$$

From equation B4 with border conditions:  $T_{R_0}$  when  $r=R_0$  and  $T_R$  when  $r=R$

$$T_{R_0} = C_1 \ln(R_0/R) + T_R \quad (B6)$$

$C_1$  es calculated replacing  $T_{R_0}$  from B6 in B3 y  $\frac{\partial T}{\partial r}$  from B5 in B3 we obtain  $C_1$

$$-C_1 = \frac{\alpha_w}{\lambda_w} \left[ \frac{1}{R_0} + \frac{\alpha_w}{\lambda_w} \ln\left(\frac{R_0}{R}\right) \right]^{-1} (T_R - T_c) \quad (B7)$$

Replacing B2 in B5 using expression B7

$$-\lambda_{\text{cr}} \frac{\partial T}{\partial r} |_{r=R} = R = \frac{\alpha_w}{R} \left[ \frac{1}{R_0} + \frac{\alpha w}{\lambda_w} \ln\left(\frac{R_0}{R}\right) \right]^{-1} (T_R - T_c) \quad (\text{B8})$$

$$-\lambda_{\text{cr}} \frac{\partial T}{\partial r} |_{r=R} = R = U_c (T_R - T_c) \quad (\text{B9})$$

Being:

$$U_c = \frac{\alpha_w}{R} \left[ \frac{1}{R_0} + \frac{\alpha w}{\lambda_w} \ln\left(\frac{R_0}{R}\right) \right]^{-1} \quad (\text{B10})$$

## SECTION C

### OPTIMAL MESH NUMBER DETERMINATION

Table S1. Element size and Mean-Absolute-Error (MAE) of the mesh types considered.

| Mesh Type      | Element size (m) | MAE    |
|----------------|------------------|--------|
| Extremely fine | 0.0300           | 1.60   |
| Finer          | 0.0825           | 2.24   |
| Normal         | 0.1500           | 4.32   |
| Coarser        | 0.2850           | 235.28 |

## SECTION D

### CONCENTRATION, TEMPERATURE AND REACTION RATE PROFILES IN 3D

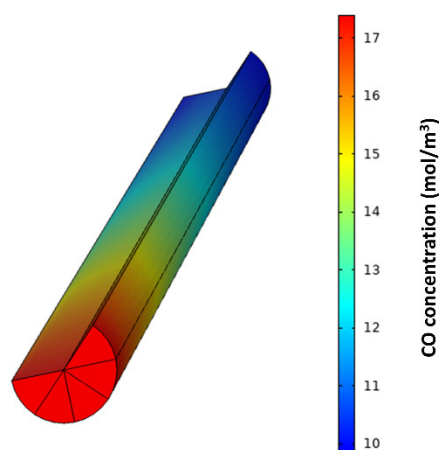

Figure S1. CO concentration (mol/m<sup>3</sup>)

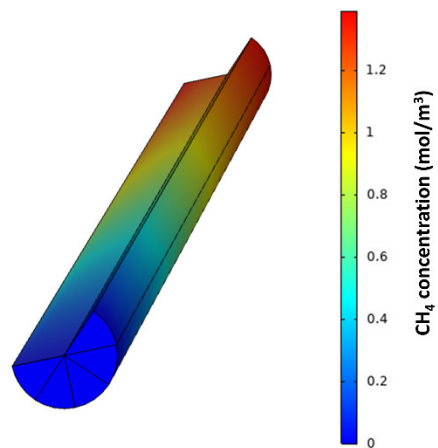

Figure S2. CH<sub>4</sub> concentration (mol/m<sup>3</sup>)

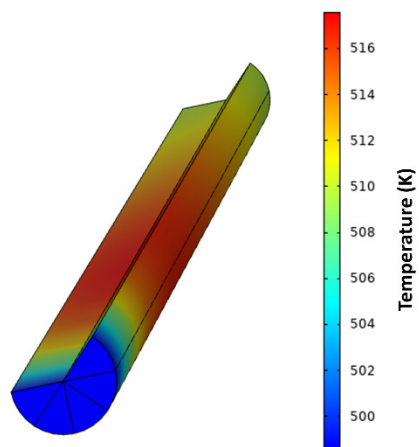

Figure S3. Temperature (K)

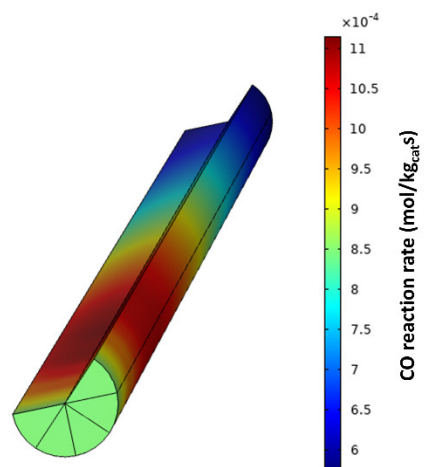

Figure S4. CO Reaction Rate (mol/kg<sub>cat</sub> s)
